# Supplementary material
Source: PubMed Central journal article supplement (PMC5838568)
Supplement: jamaoncol-4-483493-s001.pdf [file jamaoncol-4-483493-s001.pdf]

## Supplementary Online Content

De Giorgi V, Grazzini M, Benemei S, Marchionni N, Botteri E, Pennacchioli E, Geppetti P, Gandini S. Propranolol for off-label treatment of patients with melanoma: results from a cohort study. *JAMA Onc.* doi:10.1001/jamaoncol.2017.2908

**eTable 1.** Inclusion and exclusion criteria

**eTable 2.** Main clinical and histopathological characteristics of the study population based  $\beta$ -blocker treatment status

This supplementary material has been provided by the authors to give readers additional information about their work.

## ONLINE-ONLY SUPPLEMENT

**eTable 1** : Inclusion and exclusion criteria.

**eTable 2** : Main clinical and histopathological characteristics of the study population based  $\beta$ -blocker treatment status

**eTable 1** : Inclusion and exclusion criteria.

| <b><u>Inclusion criteria</u></b>                                                                      |
|-------------------------------------------------------------------------------------------------------|
| 1. 18-75 years old with newly diagnosed histologically proven resected melanoma;                      |
| 2. Stage: Ib (T1b, T2a), IIa (T2b, T3a), IIb (T3b T4a) and IIc (T4b), N0, M0; IIIA (N1a, N1b)         |
| 3. Signed Informed Consent;                                                                           |
| <b><u>Exclusion criteria</u></b>                                                                      |
| 1. Presence of metastasis                                                                             |
| 2. Clinical/radiological evidence or laboratory/pathology report of not completely resected melanoma; |
| 3. History of cancer                                                                                  |
| 4. Current use or past use in the last two years of any $\beta$ -blockers for any medical condition   |
| 5. Contraindication to the use of propranolol                                                         |

**eTable 2** : Main clinical and histopathological characteristics of the study population based  $\beta$ -blocker treatment status

|                                          | <b>PROP<br/>N=19</b> | <b>No-PROP<br/>N=34</b> | <b>P-value</b> |
|------------------------------------------|----------------------|-------------------------|----------------|
| <b>Male gender, n. (%)</b>               | 11 (57.9%)           | 22 (64.7%)              | 0.62           |
| <b>Age, Median and IQR</b>               | 58 (49, 78)          | 66 (47, 75)             | 0.88           |
| <b>Breslow thickness, Median and IQR</b> | 2.8 (1.8, 4.3)       | 2.6 (1.6, 4.0)          | 0.54           |
| <b>Melanoma stage</b>                    |                      |                         | <b>0.24</b>    |
| <b>Ib</b>                                | <b>2 (10,5%)</b>     | <b>9 (26,5%)</b>        |                |
| <b>Ila</b>                               | <b>5 (26,4%)</b>     | <b>8 (23,5%)</b>        |                |
| <b>Iib</b>                               | <b>5 (26,4%)</b>     | <b>5 (14,8%)</b>        |                |
| <b>Iic</b>                               | <b>4 (21,0%)</b>     | <b>6 (17,6%)</b>        |                |
| <b>Illa</b>                              | <b>3 (15,7%)</b>     | <b>6 (17,6%)</b>        |                |
| <b>Sentinel lymph-node involvement</b>   |                      |                         | 0.67           |
| <b>No, n. (%)</b>                        | 7 (39%)              | 15 (44%)                |                |
| <b>Yes, n. (%)</b>                       | 3 (17%)              | 6 (18%)                 |                |
| <b>Not Performed, n. (%)</b>             | <b>8 (44%)</b>       | <b>13 (38%)</b>         |                |
| <b>Site of primary melanoma</b>          |                      |                         | 0.19           |
| <b>Head or neck, n. (%)</b>              | 6 (32%)              | 4 (12%)                 |                |
| <b>Trunk, n. (%)</b>                     | 4 (21%)              | 16 (47%)                |                |
| <b>Upper limbs, n. (%)</b>               | 4 (21%)              | 6 (17%)                 |                |
| <b>Lower limbs, n. (%)</b>               | 5 (26%)              | 8 (24%)                 |                |
| <b>Histology</b>                         |                      |                         | 0.32           |
| <b>SSM, n. (%)</b>                       | 7 (37%)              | 21 (62%)                |                |
| <b>Nodular, n. (%)</b>                   | 7 (37%)              | 12 (35%)                |                |
| <b>Other</b>                             | 5 (26%)              | 1 (3%)                  |                |
| <b>Lesion with ulceration</b>            |                      |                         | 0.05           |
| <b>No, n. (%)</b>                        | 7 (37%)              | 22 (65%)                |                |
| <b>Yes, n. (%)</b>                       | 12 (63%)             | 12 (35%)                |                |
| <b>Number of mitosis</b>                 |                      |                         | 0.25           |
| <b>0, n. (%)</b>                         | 2 (11%)              | 1 (3%)                  |                |
| <b>&gt;0, n. (%)</b>                     | 17 (89%)             | <b>33 (97%)</b>         |                |
| <b>Patients with hypertension</b>        |                      |                         | 0.19           |
| <b>No, n. (%)</b>                        | 13 (68%)             | 17 (50%)                |                |
| <b>Yes, n. (%)</b>                       | 6 (32%)              | 17 (50%)                |                |
| <b>ACEi or aspirin use</b>               |                      |                         | 0.28           |
| <b>No, n. (%)</b>                        | 14 (74%)             | 20 (59%)                |                |
| <b>Yes, n. (%)</b>                       | 5 (26%)              | 14 (41%)                |                |
| <b>Events during follow-up</b>           |                      |                         |                |
| <b>Recurrences, n. (%)</b>               | 3 (16%)              | 14 (41%)                | 0.06           |
| <b>Deaths, n. (%)</b>                    | 2 (11%)              | 6 (18%)                 | 0.49           |

P-value from Chi-square or Fisher Exact tests, as appropriate
